# Supplementary material for: A Systematic Evaluation of Supervised Machine Learning Algorithms for Cell Phenotype Classification Using Single-Cell RNA Sequencing Data
Source: Front Genet. 2022 Feb 23;13:836798. doi: 10.3389/fgene.2022.836798 (PMC8905542; doi:10.3389/fgene.2022.836798)
Supplement: Supplementary file 1 [file Table2.xlsx]

## Sheet: Sheet1
Table S2. 4 filtered subsets from Packer et al.
Label	Data set	Compared cell subsets	No. of cells per group	Organism
1	GSE126954	Parent_of_hyp1V_and_ant_arc_V vs GLR	768:75	Caenorhabditis elegans
2	GSE126954	Excretory_cell vs Pharyngeal_marginal_cell	215:911	Caenorhabditis elegans
3	GSE126954	Germline vs Pharyngeal_intestinal_valve	499:493	Caenorhabditis elegans
4	GSE126954	hyp1V_and_ant_arc_V vs hmc_and_homolog	122:112	Caenorhabditis elegans
