# Supplementary material for: A Systematic Evaluation of Supervised Machine Learning Algorithms for Cell Phenotype Classification Using Single-Cell RNA Sequencing Data
Source: Front Genet. 2022 Feb 23;13:836798. doi: 10.3389/fgene.2022.836798 (PMC8905542; doi:10.3389/fgene.2022.836798)
Supplement: Supplementary file 2 [file Table3.xlsx]

## Sheet: Sheet1
Table S3. 12 filtered subsets from Packer et al.
Label	Data set	Compared cell subsets	No. of cells per group	Organism
1	GSE126954	Body_wall_muscle vs Intestine	17520:1732	Caenorhabditis elegans
2	GSE126954	Pharyngeal_muscles vs Seam_cell	2562:2766	Caenorhabditis elegans
3	GSE126954	Murray_b01 vs Waterston_500_minutes_batch_1	12129:10532	Caenorhabditis elegans
4	GSE126954	Murray_b01 vs Waterston_500_minutes_batch_2	12129:11589	Caenorhabditis elegans
5	GSE126954	Murray_b02 vs Waterston_300_minutes	3045:17168	Caenorhabditis elegans
6	GSE126954	Murray_b02 vs Waterston_500_minutes_batch_1	3045:10532	Caenorhabditis elegans
7	GSE126954	Murray_b01 vs Murray_r17	12129:9363	Caenorhabditis elegans
8	GSE126954	Waterston_300_minutes vs Waterston_400_minutes	7168:25875	Caenorhabditis elegans
9	GSE126954	Waterston_300_minutes vs Waterston_500_minutes_batch_1	17168:10532	Caenorhabditis elegans
10	GSE126954	Waterston_300_minutes vs Waterston_500_minutes_batch_2	17168:11589	Caenorhabditis elegans
11	GSE126954	Waterston_500_minutes_batch_1 vs Waterston_400_minutes	25875:10532	Caenorhabditis elegans
12	GSE126954	Waterston_500_minutes_batch_2 vs Waterston_400_minutes	25875:11589	Caenorhabditis elegans
