# Supplementary material for: A Systematic Evaluation of Supervised Machine Learning Algorithms for Cell Phenotype Classification Using Single-Cell RNA Sequencing Data
Source: Front Genet. 2022 Feb 23;13:836798. doi: 10.3389/fgene.2022.836798 (PMC8905542; doi:10.3389/fgene.2022.836798)
Supplement: Supplementary file 4 [file Table4.xlsx]

## Sheet: Sheet1
Table S4. 3 simulated data sets provided by Soneson et al.
Lable	Simulated data set	Compared cell subsets	No. of cells per group
1	GSE74596sim	Single_cell_RNA-seq_NKT0 vs Single_cell_RNA-seq_NKT17	45:44
2	GSE60749-GPL13112 sim	v6.5 mouse embryonic stem cells.culture conditions: 2i+LIF vs v6.5 mouse embryonic stem cells.culture conditions: serum+LIF	94:90
3	GSE45719 sim	16-cell stage blastomere vs Mid blastocyst cell (92-94h post-fertilization)	50:60
