# Supplementary material for: A Systematic Evaluation of Supervised Machine Learning Algorithms for Cell Phenotype Classification Using Single-Cell RNA Sequencing Data
Source: Front Genet. 2022 Feb 23;13:836798. doi: 10.3389/fgene.2022.836798 (PMC8905542; doi:10.3389/fgene.2022.836798)
Supplement: Supplementary file 5 [file Table1.xlsx]

## Sheet: Sheet1
Table S1. 27 data sets from conquer
Label	Data set	Compared cell subsets	No. of cells per group	Organism
1	EMTAB2805	G1 vs G2M	96:96	Mus musculus
2	GSE100911	mpx_EGFP.P4 vs rag2_GFP.P2	47:48	Danio rerio
3	GSE102299-smartseq2	treatment: IL33 vs treatment: PBS	282:282	Mus musculus
4	GSE45719	developmental stage: 16-cell stage blastomere vs developmental stage: Mid blastocyst cell (92-94h post-fertilization)	50:60	Mus musculus
5	GSE48968-GPL13112	stimulation: Unstimulated Replicate Experiment vs stimulation: 6h PIC Stimulation	96:96	Mus musculus
6	GSE48968-GPL17021-125bp	stimulation: Ifnar1-/-, 4h LPS stimulation vs stimulation: On Chip 4h LPS Stimulation	96:90	Mus musculus
7	GSE48968-GPL17021-25bp	stimulation: LPS4h, GolgiPlug 1h vs stimulation: LPS4h, GolgiPlug 2h	46:53	Mus musculus
8	GSE52529-GPL16791	hour post serum-switch: 0 vs hour post serum-switch: 48	96:96	Homo sapiens
9	GSE52583-GPL13112	age: Embryonic day 14.5 vs age: post natal day 107	45:46	Mus musculus
10	GSE60749-GPL13112	Dgcr 8 knockout mouse embryonic stem cells vs v6.5 mouse embryonic stem cells	94:174	Mus musculus
11	GSE60749-GPL17021	cell type: Neural precursor cells derived from in vitro differentiation of v6.5 mouse embryonic stem cells vs cell type: v6.5 mouse embryonic stem cells	54:93	Mus musculus
12	GSE62270-GPL17021	5 day YFP positive cells Replicate 1 vs Reg4-positive cells, Replicate 1, Sample I, Lane 1	96:96	Mus musculus
13	GSE62270-GPL19057	Lgr5-EGFP positive cells Replicate 1 vs Lgr5-EGFP positive cells Replicate 2	96:96	Mus musculus
14	GSE63818-GPL16791	Famle vs male	131:197	Homo sapiens
15	GSE64016	treatment: FACS sorted vs treatment: not sorted	247:213	Homo sapiens
16	GSE71585-GPL13112	input material: single cell vs tdtomato labelling: negative	81:102	Mus musculus
17	GSE71585-GPL17021	input material: single cell vs tdtomato labelling: negative	57:49	Mus musculus
18	GSE71982	Cochlear epithelium vs Vestibular epithelium	153:160	Mus musculus
19	GSE74596	Single_cell_RNA-seq_NKT0 vs Single_cell_RNA-seq_NKT1	45:46	Mus musculus
20	GSE77847	sample type: cKit+ Flt3ITD/ITD,Dnmt3afl/- MxCre AML-1 vs sample type: cKit+ Flt3ITD/ITD,Dnmt3afl/- MxCre AML-2	48:48	Mus musculus
21	GSE78779-GPL17021	age: 1 month old vs age: 6-8 weeks	140:48	Mus musculus
22	GSE79102	patient 1 single cell RNA-Seq vs patient 2 single cell RNA-Seq	85:96	Homo Sapiens
23	GSE81076-GPL16791	D3endo1 vs D3endo4	96:96	Homo Sapiens
24	GSE81076-GPL18573	D1063G vs D17-13	96:96	Homo Sapiens
25	GSE81903	retina id: 1Ra vs retina id: 2Ra	96:96	Mus musculus
23	GSE94383	time point: 300 min vs time point: 75 min	124:145	Mus musculus
24	SRP073808	H7_dreived_D2.25_Smtmrs vs H7hESC	87:77	Homo Sapiens
